# Supplementary material
Source: Springer Nature journal article supplement (https://www.springermedizin.de/resource/supplementary/12936_2014_3337_MOESM3_ESM.pdf/9545690)

# Kaplan Meier analysis PCR-corrected efficacy

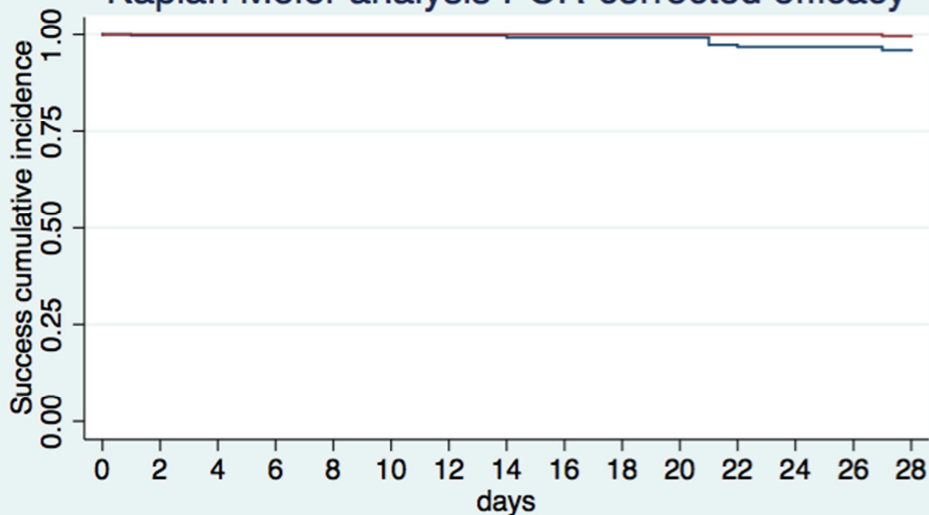

Number at risk

grup = AL 373 372 372 372 372 372 372 372 370 370 370 360 358 358 352

grup = AQ-AS 233 233 233 233 233 233 233 233 233 233 233 233 233 233 232

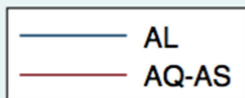

Supplement: MOESM3 [file 9545690]
